# Supplementary material for: Diversity, Ecological Role and Biotechnological Potential of Antarctic Marine Fungi
Source: MDPI journal article supplement (doi:10.3390/jof7050391), 2021-05-17

Figure S1

2,4-Dihydroxy-3,5,6-trimethylbenzoic acid

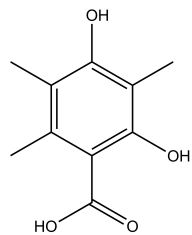

Citreorsein

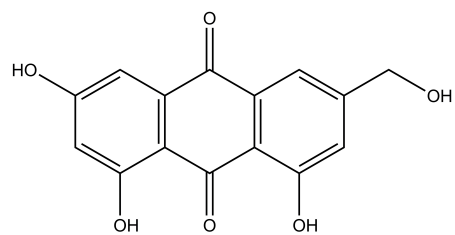

Pinselin

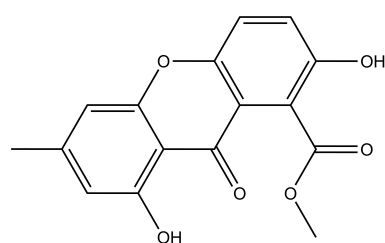

Citrinin

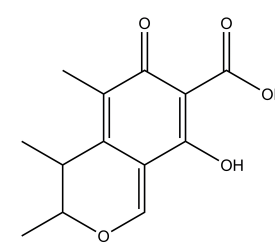

Dihydrocitrinone

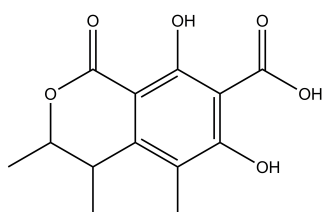

Pennicitrinone A

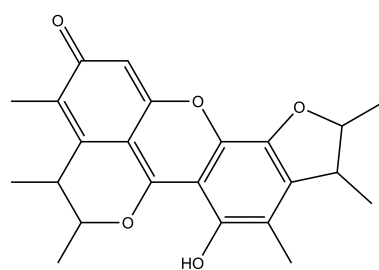

Penilactone A

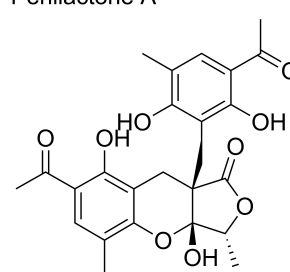

Diketopiperazine

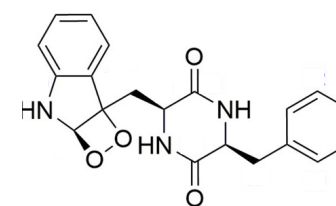

Phenolic compound

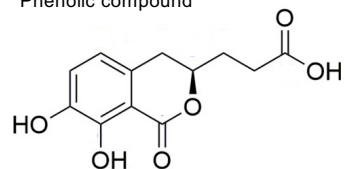

Neuchromenin

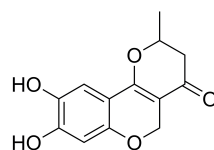

Deoxyfunicone

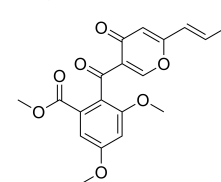

Spirograterpene A

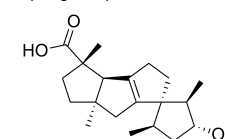

Butanolide

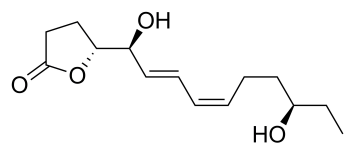

Guignarderemophilane F

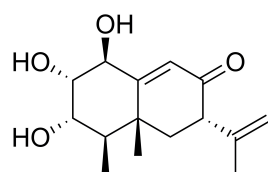

Xylarenone A

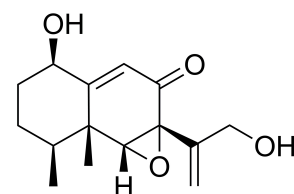

Pseudogymnoascins A

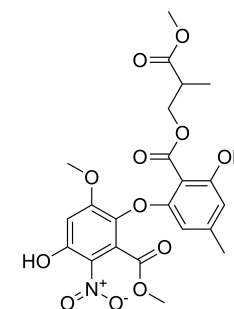

Supplement: s1 [file s1]
