# Supplementary material for: Diversity, Ecological Role and Biotechnological Potential of Antarctic Marine Fungi
Source: MDPI journal article supplement (doi:10.3390/jof7050391), 2021-05-17
Supplement: s1 [file s1]

Figure S2

Pseudogymnoascin B

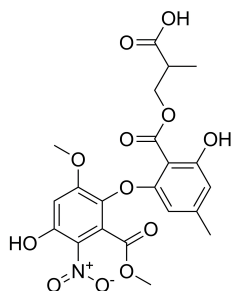

Pseudogymnoascin C

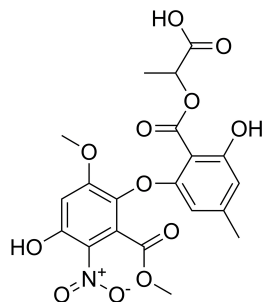

3-Nitroasterric acid

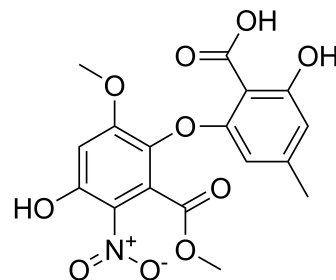

Geomycin B

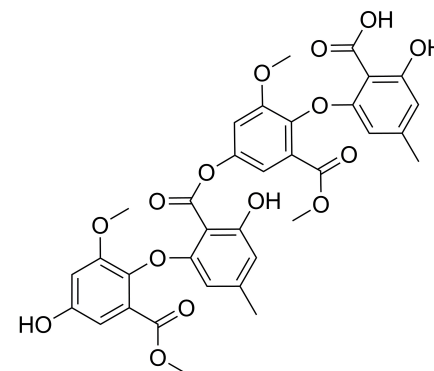

Geomycin C

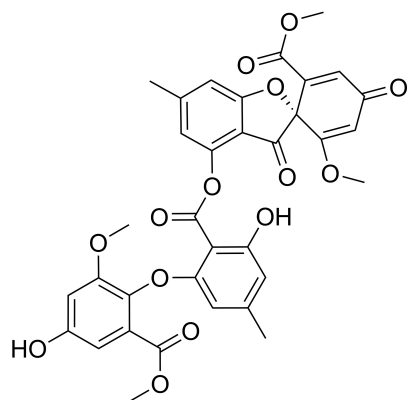

Aspereline A

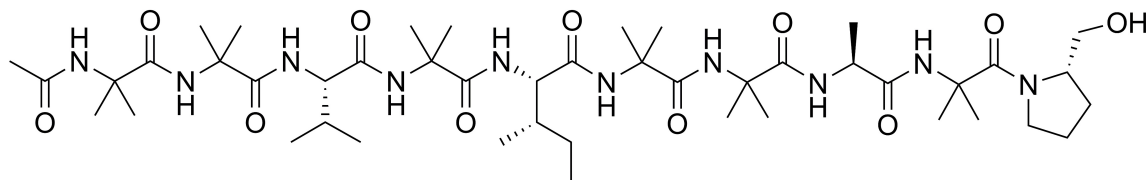

Aspereline B

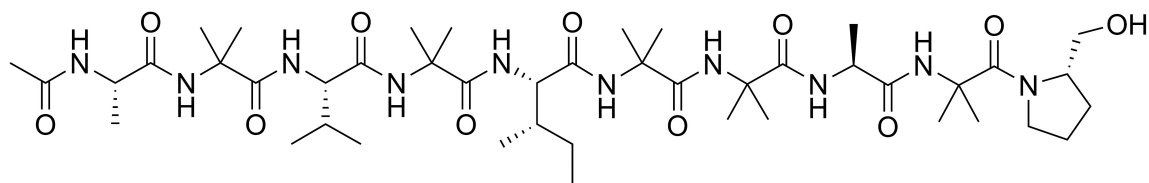

Citromycetin derivative

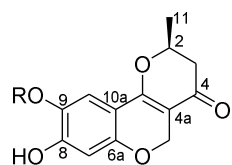

R = CH<sub>3</sub>
