# Supplementary material for: Diversity, Ecological Role and Biotechnological Potential of Antarctic Marine Fungi
Source: J Fungi (Basel). 2021 May 17;7(5):391. doi: 10.3390/jof7050391 (PMC8157204; doi:10.3390/jof7050391)
Supplement: Supplementary file 1 [file jof-07-00391-s001.zip]

Archive with 5 entries (5 files):
- TabS1.xlsx
- TabS2.xlsx
- Figure S1.pdf
- FIgure S2.pdf
- Figure S3.pdf
