# Supplementary material for: Diversity, Ecological Role and Biotechnological Potential of Antarctic Marine Fungi
Source: J Fungi (Basel). 2021 May 17;7(5):391. doi: 10.3390/jof7050391 (PMC8157204; doi:10.3390/jof7050391)
Supplement: Supplementary file 1 [file jof-07-00391-s001.zip › TabS1.xlsx]

## Sheet: table S1
Substrata	Latitude	Longitude	Reference
Macroalgae	-61.1322	-55.4333	Godinho et al., 2013
Water	-62.1317	-56.8	Goncalves et al., 2017
Water	-62.4945	-57.7942	Goncalves et al., 2017
Water	-62.6308	-57.8133	Goncalves et al., 2017
Sediment	-62.1876	58.0064	Ogaki et al., 2020
Macroalgae	-62.15	-58.4667	Loque et al., 2010
Animal	-64.7286	-62.5904	Godinho et al., 2019
Macroalgae	-62.1803	-58.2886	Furbino et al., 2018
Macroalgae	-62.2403	-58.6742	Martorell et al., 2020
Animal	-62.6506	-60.592	Godinho et al., 2019
Animal	-62.9878	-60.5531	Godinho et al., 2019
Macroalgae	-61.1322	-55.4333	Furbino et al., 2014
Animal	-62.2	-58.9642	Henriquez e t al., 2014
Animal	-60	-60	Cui et al., 2016
Macroalgae	-62.9199	-60.6633	Furbino et al., 2014
Water	-63.1443	-61.2773	Goncalves et al., 2017
Animal (M)	-60.5833	-45.5	Wang et al., 2021
Sediment	-62.22	-58.96	Wen-ting Li et al., 2018
Animal	-62.084	-58.3681	Duarte et al., 2013
Sediment	-62.1667	-58.4167	Puric et al., 2018
Sediment	-62.1667	-58.4167	Veira et al., 2018
Sediment	-62.0956	-58.332	Wentzel et al., 2019| Viera et al., 2018
Animals	-62.0833	-58.3833	Duarte et al., 2018
Sediments	-62.0833	-58.3833	Duarte et al., 2018
Macroalgae	-62.3993	-59.7015	Duarte et al., 2016
Water	-62.0833	-58.3333	Vaz et al., 2011
Animal	-62.0905	-58.4083	Godinho et al., 2019
Macroalgae	-62.0861	-58.4131	Furbino et al., 2014
Animal	-62.4625	-59.5014	Godinho et al., 2019
Water	-62.0765	-57.5544	Goncalves et al., 2017
Sediment (M)	-62.1876	58.0064	Ogaki et al., 2021
Animals	-62.0833	-58.4	Duarte et al., 2018
Macroalgae	-62.0865	-57.9438	Duarte et al., 2016
Macroalgae	-62.9798	-60.5577	Duarte et al., 2016
Sediment	-62.084	-58.3681	Duarte et al., 2013
Macroalgae	-60.6667	40.0167	Petrescu et al., 2000
Sediment	-62.9167	-60.6167	Vaz et al., 2011
Animal	-62.2	-58.9639	Vaca et al., 2013
Animal	-64.8317	-63.4837	Godinho et al., 2019
Macroalgae	-62.084	-58.3681	Duarte et al., 2013
Water	-62.5804	-58.8285	Goncalves et al., 2017
Water	-64.5692	-62.4986	Goncalves et al., 2017
Water	-63.0259	-60.4947	Goncalves et al., 2017
Sediment	-60.7167	-45.6333	Weinstein et al., 2000
Macroalgae	-62.3807	-59.7002	Duarte et al., 2016
Animal	-62.2	-58.9642	Laich et al., 2014| Laich et al., 2013
Water	-62.1667	-58.4167	Turkiewicz et al., 2005
Macroalgae	-62.7142	-60.6092	Furbino et al., 2018
Macroalgae	-62.0839	-58.381	Duarte et al., 2016
Macroalgae	-62.5963	-59.9015	Duarte et al., 2016
Animal	-62.3812	-59.7848	Godinho et al., 2019
Animal	-62.3824	-59.6944	Godinho et al., 2019
Animal	-62.9857	-60.5658	Godinho et al., 2019
Animal	-74.6277	-164.241	Dong-Cheol Kim et al., 2014
Sediment	-62.0833	-58.35	Goncalves et al., 2013
Water	-63.7188	-61.3722	Goncalves et al., 2017
Sediment	-68.34	77.57	Liu et al., 2019
Sediment	-74.5733	-166.181	Minh Ha et al., 2020
Sediment	-66.8333	68	Niu et al., 2017
Sediment	-66.8364	72.9667	Wu et al., 2012
Sediment	-68.8245	73.5089	Wu et al., 2013| Lin et al., 2014
Sediment	-62.0833	-47.15	Zhou et al., 2018
Animals	-62.0833	-58.3833	Duarte et al., 2018
Sediments	-62.0833	-58.3625	Duarte et al., 2018
Sediment	-62.1	-57.9281	Ren et al., 2013
Animals	-62.1998	-58.9431	Moreno-Pino et al., 2020
Animals	-62.1882	-58.873	Moreno-Pino et al., 2020
Animal	-63.3989	-56.9916	Godinho et al., 2019
Animal	-62.4464	-59.739	Godinho et al., 2019
Animal	-62.7753	-61.2858	Godinho et al., 2019
Animal	-62.0706	-57.986	Godinho et al., 2019
Macroalgae	-62.0861	-58.4131	Godinho et al., 2013
Macroalgae	-62.9199	-60.6633	Godinho et al., 2013
Sediment	-62.0833	-58.4167	Goncalves et al., 2013
Sediment	-62.1	-58.4333	Goncalves et al., 2013
Sediment	-62.15	-58.3833	Goncalves et al., 2013
Sediment	-62.1833	-58.3167	Goncalves et al., 2013
Sediment	-62.1833	-58.3667	Goncalves et al., 2013
Sediment	-62.25	-58.2	Goncalves et al., 2013
Sediment	-62.25	-58.2833	Goncalves et al., 2013
Sediment	-62.2667	-58.1833	Goncalves et al., 2013
Sediment	-62.2667	-58.2667	Goncalves et al., 2013
Sediment	-62.2667	-58.35	Goncalves et al., 2013
Sediment	-62.2833	-58.3167	Goncalves et al., 2013
Sediment	-59.0015	62.7545	Ogaki et al., 2020
Sediment	-62.2439	58.9522	Ogaki et al., 2020
Sediment	-62.2445	58.9339	Ogaki et al., 2020
Sediment (M)	-59.0015	62.7545	Ogaki et al., 2021
Sediment (M)	-62.2439	58.9522	Ogaki et al., 2021
Sediment (M)	-62.2445	58.9339	Ogaki et al., 2021
Water	-62.0833	-58.3167	Vaz et al., 2011
Sediment	-62.1167	-58.3833	Vaz et al., 2011
Sediment	-62.1667	-58.4333	Vaz et al., 2011
Sediment	-62.0724	-58.4205	Wentzel et al., 2019| Viera et al., 2018
Sediment	-62.0729	-58.4222	Wentzel et al., 2019| Viera et al., 2018
Sediment	-62.0836	-58.3498	Wentzel et al., 2019| Viera et al., 2018
Sediment	-62.0855	-58.3893	Wentzel et al., 2019| Viera et al., 2018
Animals	-62.1998	-58.9431	Moreno-Pino et al., 2020
Animals	-62.1882	-58.873	Moreno-Pino et al., 2020
