# Supplementary material for: Diversity, Ecological Role and Biotechnological Potential of Antarctic Marine Fungi
Source: J Fungi (Basel). 2021 May 17;7(5):391. doi: 10.3390/jof7050391 (PMC8157204; doi:10.3390/jof7050391)
Supplement: Supplementary file 1 [file jof-07-00391-s001.zip › TabS2.xlsx]

## Sheet: FIG 2sources-isolates
Surce taxa	Substrata	F. Order	F. Family	F. Genus	Reference
Antarctonemertes valida	Animals	Thelebolales	Thelebolaceae	Antarctomyces	Godinho et al., 2019
Laevilacunaria antarctica	Animals	Thelebolales	Thelebolaceae	Antarctomyces	Godinho et al., 2019
Nacella concinna	Animals	Thelebolales	Thelebolaceae	Antarctomyces	Godinho et al., 2019
Dendrila sp.	Animals	Eurotiales	Aspergillaceae	Aspergillus	Henriquez e t al., 2014
Euphausia superba	Animals	Eurotiales	Aspergillaceae	Aspergillus	Cui et al., 2016
Nacella concinna	Animals	Eurotiales	Aspergillaceae	Aspergillus	Godinho et al., 2019
	Animals	Eurotiales	Aspergillaceae	Aspergillus	Godinho et al., 2019
Dendrila sp.	Animals	Hypocreales	Cordycipitaceae	Aureobasidium	Henriquez e t al., 2014
	Animals	Tremellales	Bulleraceae	Bullera	Duarte et al., 2013
	Animals	Helotiales	Ploettnerulaceae	Cadophora	Duarte et al., 2018
	Animals	Helotiales	Ploettnerulaceae	Cadophora	Duarte et al., 2018
Nacella concinna	Animals	Saccharomycetales	Saccharomycetaceae	Candida	Godinho et al., 2019
	Animals	Saccharomycetales	Saccharomycetaceae	Candida	Duarte et al., 2013
Antarctonemertes valida	Animals	Cladosporiales	Cladosporiaceae	Cladosporium	Godinho et al., 2019
Dendrila sp.	Animals	Cladosporiales	Cladosporiaceae	Cladosporium	Henriquez e t al., 2014
Euphausia superba	Animals	Cladosporiales	Cladosporiaceae	Cladosporium	Cui et al., 2016
Nacella concinna	Animals	Cladosporiales	Cladosporiaceae	Cladosporium	Godinho et al., 2019
Tigriopus kingsejongensis	Animals	Cladosporiales	Cladosporiaceae	Cladosporium	Godinho et al., 2019
	Animals	Cladosporiales	Cladosporiaceae	Cladosporium	Duarte et al., 2018
	Animals	Cladosporiales	Cladosporiaceae	Cladosporium	Duarte et al., 2018
	Animals	Cladosporiales	Cladosporiaceae	Cladosporium	Duarte et al., 2018
	Animals	Cladosporiales	Cladosporiaceae	Cladosporium	Duarte et al., 2018
Nacella concinna	Animals	Saccharomycetales	Metschnikowiaceae	Clavispora	Godinho et al., 2019
	Animals	Tremellales	Cryptococcaceae	Cryptococcus	Duarte et al., 2013
	Animals	Tremellales	Cryptococcaceae	Cryptococcus	Duarte et al., 2013
	Animals	Tremellales	Cryptococcaceae	Cryptococcus	Duarte et al., 2013
	Animals	Tremellales	Cryptococcaceae	Cryptococcus	Duarte et al., 2013
﻿Hymeniacidon	Animals	Cystofilobasidiales	Cystofilobasidiaceae	Cystofilobasidium	Vaca et al., 2013
Tedania	Animals	Cystofilobasidiales	Cystofilobasidiaceae	Cystofilobasidium	Vaca et al., 2013
	Animals	Cystofilobasidiales	Cystofilobasidiaceae	Cystofilobasidium	Duarte et al., 2013
	Animals	Cystofilobasidiales	Cystofilobasidiaceae	Cystofilobasidium	Duarte et al., 2013
Nacella concinna	Animals	Saccharomycetales	Debaryomycetaceae	Debaryomyces	Godinho et al., 2019
Tigriopus kingsejongensis	Animals	Saccharomycetales	Debaryomycetaceae	Debaryomyces	Godinho et al., 2019
Trepaxonemata sp.	Animals	Saccharomycetales	Debaryomycetaceae	Debaryomyces	Godinho et al., 2019
	Animals	Saccharomycetales	Debaryomycetaceae	Debaryomyces	Duarte et al., 2013
Antarctonemertes valida	Animals	Pleosporales	Didymellaceae	Didymella	Godinho et al., 2019
	Animals	Pleosporales	Didymellaceae	Didymella	Godinho et al., 2019
Dendrila sp.	Animals	Pleosporales	Didymellaceae	Epicoccum	Henriquez e t al., 2014
Nacella concinna	Animals	Saccharomycetales	Dipodascaceae	Geotrichum	Godinho et al., 2019
Antarctonemertes valida	Animals	Kriegeriales	Camptobasidiaceae	Glaciozyma	Godinho et al., 2019
Nacella concinna	Animals	Kriegeriales	Camptobasidiaceae	Glaciozyma	Godinho et al., 2019
	Animals	Cystofilobasidiales	Cystofilobasidiaceae	Guehomyces	Duarte et al., 2013
Nacella concinna	Animals	Holtermanniales		Holtermanniella	Godinho et al., 2019
	Animals	Hypocreales	Cordycipitaceae	Letendraea	Godinho et al., 2019
﻿Hymeniacidon	Animals	Leucosporidiales	Leucosporidiaceae	Leucosporidiella	Vaca et al., 2013
Tedania	Animals	Leucosporidiales	Leucosporidiaceae	Leucosporidiella	Vaca et al., 2013
	Animals	Leucosporidiales	Leucosporidiaceae	Leucosporidium	Laich et al., 2014| Laich et al., 2013
Antarctonemertes valida	Animals	Saccharomycetales	Metschnikowiaceae	Metschnikowia	Godinho et al., 2019
﻿Dendrilla	Animals	Saccharomycetales	Metschnikowiaceae	Metschnikowia	Vaca et al., 2013
Halyclystus antarticus	Animals	Saccharomycetales	Metschnikowiaceae	Metschnikowia	Godinho et al., 2019
﻿Hymeniacidon	Animals	Saccharomycetales	Metschnikowiaceae	Metschnikowia	Vaca et al., 2013
Laevilacunaria antarctica	Animals	Saccharomycetales	Metschnikowiaceae	Metschnikowia	Godinho et al., 2019
Magelonidae	Animals	Saccharomycetales	Metschnikowiaceae	Metschnikowia	Godinho et al., 2019
﻿Poecilosclerida	Animals	Saccharomycetales	Metschnikowiaceae	Metschnikowia	Vaca et al., 2013
Tedania	Animals	Saccharomycetales	Metschnikowiaceae	Metschnikowia	Vaca et al., 2013
	Animals	Saccharomycetales	Metschnikowiaceae	Metschnikowia	Duarte et al., 2013
	Animals	Saccharomycetales	Metschnikowiaceae	Metschnikowia	Godinho et al., 2019
	Animals	Saccharomycetales	Metschnikowiaceae	Metschnikowia	Godinho et al., 2019
Euphausia superba	Animals	Saccharomycetales	Debaryomycetaceae	Meyerozyma	Cui et al., 2016
Nacella concinna	Animals	Saccharomycetales	Debaryomycetaceae	Meyerozyma	Godinho et al., 2019
	Animals	Saccharomycetales	Debaryomycetaceae	Meyerozyma	Duarte et al., 2013
	Animals	Saccharomycetales	Debaryomycetaceae	Meyerozyma	Duarte et al., 2013
	Animals	Saccharomycetales	Debaryomycetaceae	Meyerozyma	Duarte et al., 2013
	Animals	Saccharomycetales	Debaryomycetaceae	Meyerozyma	Duarte et al., 2013
Antarctonemertes valida	Animals	Helotiales	Mollisiaceae	Mollisia	Godinho et al., 2019
Antarctonemertes valida	Animals	Mortierellales	Mortierellaceae	Mortierella	Godinho et al., 2019
Nacella concinna	Animals	Mortierellales	Mortierellaceae	Mortierella	Godinho et al., 2019
Antarctonemertes valida	Animals	Cystofilobasidiales	Cystofilobasidiaceae	Mrakia	Godinho et al., 2019
Magelonidae	Animals	Cystofilobasidiales	Cystofilobasidiaceae	Mrakia	Godinho et al., 2019
Nacella concinna	Animals	Cystofilobasidiales	Cystofilobasidiaceae	Mrakia	Godinho et al., 2019
	Animals	Pleosporineae	Didymellaceae	Nothophoma	Godinho et al., 2019
	Animals	Leotiomycetes incertae sedis	Myxotrichaceae	Oidiodendron	Duarte et al., 2018
Antarctonemertes valida	Animals	Eurotiales	Aspergillaceae	Penicillium	Godinho et al., 2019
Dendrila sp.	Animals	Eurotiales	Aspergillaceae	Penicillium	Henriquez e t al., 2014
Euphausia superba	Animals	Eurotiales	Aspergillaceae	Penicillium	Cui et al., 2016
Nacella concinna	Animals	Eurotiales	Aspergillaceae	Penicillium	Godinho et al., 2019
Tigriopus kingsejongensis	Animals	Eurotiales	Aspergillaceae	Penicillium	Godinho et al., 2019
Trepaxonemata sp.	Animals	Eurotiales	Aspergillaceae	Penicillium	Godinho et al., 2019
	Animals	Eurotiales	Aspergillaceae	Penicillium	Dong-Cheol Kim et al., 2014
	Animals	Eurotiales	Aspergillaceae	Penicillium	Godinho et al., 2019
	Animals	Eurotiales	Aspergillaceae	Penicillium	Godinho et al., 2019
	Animals	Eurotiales	Aspergillaceae	Penicillium	Duarte et al., 2018
	Animals	Eurotiales	Aspergillaceae	Penicillium	Duarte et al., 2018
	Animals	Eurotiales	Aspergillaceae	Penicillium	Duarte et al., 2018
	Animals	Eurotiales	Aspergillaceae	Penicillium	Duarte et al., 2018
Antarctonemertes valida	Animals	Xylariales	Sporocadaceae	Pestalotiopsis	Godinho et al., 2019
	Animals	Xylariales	Sporocadaceae	Pestalotiopsis	Godinho et al., 2019
Dendrila sp.	Animals	Pleosporales	Didymellaceae	Phoma	Henriquez e t al., 2014
	Animals	Pleosporales	Didymellaceae	Phoma	Godinho et al., 2019
Nacella concinna	Animals	Eurotiales	Aspergillaceae	Polypaecilum	Godinho et al., 2019
Dendrila sp.	Animals	Leotiomycetes incertae sedis	Pseudeurotiaceae	Pseudeurotium	Henriquez e t al., 2014
﻿Hymeniacidon	Animals	Sporidiobolales	Sporidiobolaceae	Rhodotorula	Vaca et al., 2013
Nacella concinna	Animals	Sporidiobolales	Sporidiobolaceae	Rhodotorula	Godinho et al., 2019
	Animals	Sporidiobolales	Sporidiobolaceae	Rhodotorula	Duarte et al., 2013
	Animals	Sporidiobolales	Sporidiobolaceae	Rhodotorula	Duarte et al., 2013
	Animals	Sporidiobolales	Sporidiobolaceae	Rhodotorula	Duarte et al., 2013
	Animals	Sporidiobolales	Sporidiobolaceae	Rhodotorula	Duarte et al., 2013
	Animals	Sporidiobolales	Sporidiobolaceae	Rhodotorula	Laich et al., 2014| Laich et al., 2013
	Animals	Sporidiobolales	Sporidiobolaceae	Rhodotorula	Laich et al., 2014| Laich et al., 2013
	Animals	Sporidiobolales	Sporidiobolaceae	Rhodotorula	Laich et al., 2014| Laich et al., 2013
	Animals	Sporidiobolales	Sporidiobolaceae	Rhodotorula	Laich et al., 2014| Laich et al., 2013
Tigriopus kingsejongensis	Animals	Mycosphaerellales	Mycosphaerellaceae	Septoria	Godinho et al., 2019
Euphausia superba	Animals	Eurotiales	Trichocomaceae	Talaromyces	Cui et al., 2016
Dendrila sp.	Animals	Thelebolales	Thelebolaceae	Thelebolus	Henriquez e t al., 2014
Nacella concinna	Animals	Thelebolales	Thelebolaceae	Thelebolus	Godinho et al., 2019
	Animals	Thelebolales	Thelebolaceae	Thelebolus	Godinho et al., 2019
	Animals	Thelebolales	Thelebolaceae	Thelebolus	Duarte et al., 2018
Dendrila sp.	Animals	Sordariales	Chaetomiaceae	Trichocladium	Henriquez e t al., 2014
Laevilacunaria antarctica	Animals	Tremellales	Bulleribasidiaceae	Vishniacozyma	Godinho et al., 2019
	Animals	Saccharomycetales	Wickerhamomycetaceae	Wickerhamomyces	Duarte et al., 2013
	Animals	Thelebolales	Pseudeurotiaceae	Geomyces	Duarte et al., 2018
	Animals	Thelebolales	Pseudeurotiaceae	Geomyces	Duarte et al., 2018
	Animals	Thelebolales	Pseudeurotiaceae	Geomyces	Duarte et al., 2018
	Animals	Thelebolales	Pseudeurotiaceae	Geomyces	Duarte et al., 2018
	Animals	Thelebolales	Pseudeurotiaceae	Geomyces	Duarte et al., 2018
	Animals	Thelebolales	Pseudeurotiaceae	Pseudogymnoascus	Duarte et al., 2018
	Animals	Thelebolales	Pseudeurotiaceae	Pseudogymnoascus	Duarte et al., 2018
	Animals	Thelebolales	Pseudeurotiaceae	Pseudogymnoascus	Duarte et al., 2018
Nacella concinna	Animals	Thelebolales	Pseudeurotiaceae	Pseudogymnoascus	Godinho et al., 2019
Laevilacunaria antarctica	Animals	Thelebolales	Pseudeurotiaceae	Pseudogymnoascus	Godinho et al., 2019
Nacella concinna	Animals	Thelebolales	Pseudeurotiaceae	Pseudogymnoascus	Godinho et al., 2019
Tigriopus kingsejongensis	Animals	Thelebolales	Pseudeurotiaceae	Pseudogymnoascus	Godinho et al., 2019
Trepaxonemata sp.	Animals	Thelebolales	Pseudeurotiaceae	Pseudogymnoascus	Godinho et al., 2019
	Animals	Thelebolales	Pseudeurotiaceae	Pseudogymnoascus	Godinho et al., 2019
	Animals	Thelebolales	Pseudeurotiaceae	Pseudogymnoascus	Godinho et al., 2019
Dendrila sp.	Animals	Thelebolales	Pseudeurotiaceae	Pseudogymnoascus	Henriquez e t al., 2014
	Animals (M)	Eurotiales	Aspergillaceae	Aspergillus	Wang et al., 2021
	Animals (M)	Hypocreales	Cordycipitaceae	Beauveria	Wang et al., 2021
	Animals (M)	Pleosporales	Pleosporaceae	Bipolaris	Wang et al., 2021
	Animals (M)	Helotiales	Sclerotiniaceae	Botryotinia	Wang et al., 2021
	Animals (M)	Saccharomycetales	Saccharomycetaceae	Candida	Wang et al., 2021
	Animals (M)	Tremellales	Cryptococcaceae	Cryptococcus	Wang et al., 2021
	Animals (M)	Hypocreales	Nectriaceae	Fusarium	Wang et al., 2021
	Animals (M)	Tremellales	Tremellales incertae sedis	Hannaella	Wang et al., 2021
	Animals (M)	Saccharomycetales	Saccharomycetaceae	Issatchenkia	Wang et al., 2021
	Animals (M)	Sordariales	Chaetomiaceae	Mycothermus	Wang et al., 2021
	Animals (M)	Leotiomycetes incertae sedis	Myxotrichaceae	Oidiodendron	Wang et al., 2021
	Animals (M)	Eurotiales	Aspergillaceae	Penicillium	Wang et al., 2021
	Animals (M)	Phanerochaetaceae	Phlebiopsis	Phlebiopsis	Wang et al., 2021
	Animals (M)	Saccharomycetales	Saccharomycetaceae	Pichia	Wang et al., 2021
	Animals (M)	Hymenochaetales	Hymenochaetaceae	Tropicoporus	Wang et al., 2021
	Animals (M)	Saccharomycetales	Wickerhamomycetaceae	Wickerhamomyces	Wang et al., 2021
Palmaria decipiens	Macroalgae	Hypocreales	Hypocreales incertae sedis	Acremonium	Godinho et al., 2013
Adenocystis utricularis	Macroalgae	Thelebolales	Thelebolaceae	Antarctomyces	Loque et al., 2010
Ascoseira mirabilis	Macroalgae	Thelebolales	Thelebolaceae	Antarctomyces	Furbino et al., 2018
Ballia calliatrichia	Macroalgae	Thelebolales	Thelebolaceae	Antarctomyces	Martorell et al., 2020
Pyropia endiviifolia	Macroalgae	Thelebolales	Thelebolaceae	Antarctomyces	Furbino et al., 2014
Ulva	Macroalgae	Thelebolales	Thelebolaceae	Antarctomyces	Godinho et al., 2013
Adenocystis	Macroalgae	Eurotiales	Aspergillaceae	Aspergillus	Godinho et al., 2013
Monostroma hariotii	Macroalgae	Eurotiales	Aspergillaceae	Aspergillus	Furbino et al., 2014
Monostroma hariotii	Macroalgae	Eurotiales	Aspergillaceae	Aspergillus	Furbino et al., 2014
Palmaria decipiens	Macroalgae	Eurotiales	Aspergillaceae	Aspergillus	Godinho et al., 2013
Phaeurus	Macroalgae	Eurotiales	Aspergillaceae	Aspergillus	Godinho et al., 2013
Pyropia endiviifolia	Macroalgae	Eurotiales	Aspergillaceae	Aspergillus	Furbino et al., 2014
Ascoseira mirabilis	Macroalgae	Hypocreales	Cordycipitaceae	Beauveria	Furbino et al., 2018
Pyropia endiviifolia	Macroalgae	Helotiales	Ploettnerulaceae	Cadophora	Furbino et al., 2014
Acrosiphonia	Macroalgae	Saccharomycetales	Saccharomycetaceae	Candida	Godinho et al., 2013
Desmarestia menziesii	Macroalgae	Saccharomycetales	Saccharomycetaceae	Candida	Duarte et al., 2016
Palmaria decipiens	Macroalgae	Sordariales	Chaetomiaceae	Chaetomium	Godinho et al., 2013
Acrosiphonia	Macroalgae	Cladosporiales	Cladosporiaceae	Cladosporium	Godinho et al., 2013
Adenocystis urticularis	Macroalgae	Cladosporiales	Cladosporiaceae	Cladosporium	Martorell et al., 2020
Ascoseira mirabilis	Macroalgae	Cladosporiales	Cladosporiaceae	Cladosporium	Furbino et al., 2018
Georgiella confluens	Macroalgae	Cladosporiales	Cladosporiaceae	Cladosporium	Furbino et al., 2018
Gigartina skottsbergii	Macroalgae	Cladosporiales	Cladosporiaceae	Cladosporium	Martorell et al., 2020
Monostroma hariotii	Macroalgae	Cladosporiales	Cladosporiaceae	Cladosporium	Furbino et al., 2014
Neuroglossum delesseriae	Macroalgae	Cladosporiales	Cladosporiaceae	Cladosporium	Martorell et al., 2020
Palmaria decipiens	Macroalgae	Cladosporiales	Cladosporiaceae	Cladosporium	Martorell et al., 2020
Pyropia endiviifolia	Macroalgae	Cladosporiales	Cladosporiaceae	Cladosporium	Furbino et al., 2014
Pyropia endiviifolia	Macroalgae	Cladosporiales	Cladosporiaceae	Cladosporium	Furbino et al., 2014
Himantothallus grandifolius	Macroalgae	Tremellales	Cryptococcaceae	Cryptococcus	Duarte et al., 2016
Monostoma	Macroalgae	Tremellales	Cryptococcaceae	Cryptococcus	Godinho et al., 2013
Monostroma hariotii	Macroalgae	Tremellales	Cryptococcaceae	Cryptococcus	Furbino et al., 2014
Palmaria decipiens	Macroalgae	Tremellales	Cryptococcaceae	Cryptococcus	Duarte et al., 2016
Palmaria decipiens	Macroalgae	Tremellales	Cryptococcaceae	Cryptococcus	Loque et al., 2010
Ulva	Macroalgae	Tremellales	Cryptococcaceae	Cryptococcus	Godinho et al., 2013
Monostroma hariotii	Macroalgae	Cystofilobasidiales	Cystofilobasidiaceae	Cystofilobasidium	Furbino et al., 2014
Acrosiphonia	Macroalgae	Saccharomycetales	Debaryomycetaceae	Debaryomyces	Godinho et al., 2013
Adenocystis	Macroalgae	Saccharomycetales	Debaryomycetaceae	Debaryomyces	Godinho et al., 2013
	Macroalgae	Saccharomycetales	Debaryomycetaceae	Debaryomyces	Duarte et al., 2013
Himantothallus grandifolius	Macroalgae	Tremellales	Tremellaceae	Dioszegia	Duarte et al., 2016
Palmaria decipiens	Macroalgae	Tremellales	Tremellaceae	Dioszegia	Duarte et al., 2016
Pyropia endiviifolia	Macroalgae	Saccharomycetales	Dipodascaceae	Dipodascus	Furbino et al., 2014
Palmaria decipiens	Macroalgae	Microascales	Microascaceae	Doratomyces	Furbino et al., 2018
Ulva	Macroalgae	Hypocreales	Cordycipitaceae	Engyodontium	Godinho et al., 2013
Phaeurus	Macroalgae	Eurotiales	Aspergillaceae	Eurotium	Godinho et al., 2013
Palmaria decipiens	Macroalgae	Hypocreales	Nectriaceae	Fusarium	Godinho et al., 2013
Adenocystis utricularis	Macroalgae	Kriegeriales	Camptobasidiaceae	Glaciozyma	Duarte et al., 2016
Desmarestia menziesii	Macroalgae	Kriegeriales	Camptobasidiaceae	Glaciozyma	Duarte et al., 2016
Gigartina skottsbergii	Macroalgae	Kriegeriales	Camptobasidiaceae	Glaciozyma	Duarte et al., 2016
Monostroma hariotii	Macroalgae	Cystofilobasidiales	Cystofilobasidiaceae	Guehomyces	Furbino et al., 2014
Himantothallus grandifolius	Macroalgae	Holtermanniales		Holtermanniella	Duarte et al., 2016
Monostoma	Macroalgae	Hypocreales	Cordycipitaceae	Lecanicillium	Godinho et al., 2013
Ascoseira mirabilis	Macroalgae	Leucosporidiales	Leucosporidiaceae	Leucosporidiella	Furbino et al., 2018
Gigartina skottsbergii	Macroalgae	Leucosporidiales	Leucosporidiaceae	Leucosporidiella	Duarte et al., 2016
Himantothallus grandifolius	Macroalgae	Leucosporidiales	Leucosporidiaceae	Leucosporidiella	Duarte et al., 2016
Acrosiphonia	Macroalgae	Saccharomycetales	Metschnikowiaceae	Metschnikowia	Godinho et al., 2013
Adenocystis utricularis	Macroalgae	Saccharomycetales	Metschnikowiaceae	Metschnikowia	Duarte et al., 2016
Adenocystis utricularis	Macroalgae	Saccharomycetales	Metschnikowiaceae	Metschnikowia	Loque et al., 2010
Ascoseira mirabilis	Macroalgae	Saccharomycetales	Metschnikowiaceae	Metschnikowia	Furbino et al., 2018
Ascoseira mirabilis	Macroalgae	Saccharomycetales	Metschnikowiaceae	Metschnikowia	Duarte et al., 2016
Curdiea racovitzae	Macroalgae	Saccharomycetales	Metschnikowiaceae	Metschnikowia	Furbino et al., 2018
Curdiea racovitzae	Macroalgae	Saccharomycetales	Metschnikowiaceae	Metschnikowia	Duarte et al., 2016
Cystosphaera jacquinotii	Macroalgae	Saccharomycetales	Metschnikowiaceae	Metschnikowia	Duarte et al., 2016
Desmarestia	Macroalgae	Saccharomycetales	Metschnikowiaceae	Metschnikowia	Godinho et al., 2013
Desmarestia anceps	Macroalgae	Saccharomycetales	Metschnikowiaceae	Metschnikowia	Duarte et al., 2016
Desmarestia anceps	Macroalgae	Saccharomycetales	Metschnikowiaceae	Metschnikowia	Loque et al., 2010
Desmarestia menziesii	Macroalgae	Saccharomycetales	Metschnikowiaceae	Metschnikowia	Duarte et al., 2016
Desmarestia menziesii	Macroalgae	Saccharomycetales	Metschnikowiaceae	Metschnikowia	Duarte et al., 2016
Georgiella confluens	Macroalgae	Saccharomycetales	Metschnikowiaceae	Metschnikowia	Furbino et al., 2018
Gigartina skottsbergii	Macroalgae	Saccharomycetales	Metschnikowiaceae	Metschnikowia	Duarte et al., 2016
Gigartina skottsbergii	Macroalgae	Saccharomycetales	Metschnikowiaceae	Metschnikowia	Duarte et al., 2016
Gigartina skottsbergii	Macroalgae	Saccharomycetales	Metschnikowiaceae	Metschnikowia	Duarte et al., 2016
Himantothallus grandifolius	Macroalgae	Saccharomycetales	Metschnikowiaceae	Metschnikowia	Duarte et al., 2016
Iridaea cordata	Macroalgae	Saccharomycetales	Metschnikowiaceae	Metschnikowia	Furbino et al., 2018
Iridaea cordata	Macroalgae	Saccharomycetales	Metschnikowiaceae	Metschnikowia	Duarte et al., 2016
Palmaria decipiens	Macroalgae	Saccharomycetales	Metschnikowiaceae	Metschnikowia	Furbino et al., 2018
Palmaria decipiens	Macroalgae	Saccharomycetales	Metschnikowiaceae	Metschnikowia	Loque et al., 2010
Pyropia endiviifolia	Macroalgae	Saccharomycetales	Metschnikowiaceae	Metschnikowia	Furbino et al., 2014
Adenocystis	Macroalgae	Saccharomycetales	Debaryomycetaceae	Meyerozyma	Godinho et al., 2013
Monostoma	Macroalgae	Saccharomycetales	Debaryomycetaceae	Meyerozyma	Godinho et al., 2013
Monostroma hariotii	Macroalgae	Saccharomycetales	Debaryomycetaceae	Meyerozyma	Furbino et al., 2014
Pyropia endiviifolia	Macroalgae	Saccharomycetales	Debaryomycetaceae	Meyerozyma	Furbino et al., 2014
	Macroalgae	Saccharomycetales	Debaryomycetaceae	Meyerozyma	Duarte et al., 2013
Acrosiphonia	Macroalgae	Mortierellales	Mortierellaceae	Mortierella	Godinho et al., 2013
Pyropia endiviifolia	Macroalgae	Mortierellales	Mortierellaceae	Mortierella	Furbino et al., 2014
Cystosphaera jacquinotii	Macroalgae	Cystofilobasidiales	Cystofilobasidiaceae	Mrakia	Duarte et al., 2016
Desmarestia anceps	Macroalgae	Cystofilobasidiales	Cystofilobasidiaceae	Mrakia	Duarte et al., 2016
Desmarestia menziesii	Macroalgae	Cystofilobasidiales	Cystofilobasidiaceae	Mrakia	Duarte et al., 2016
Desmarestia menziesii	Macroalgae	Cystofilobasidiales	Cystofilobasidiaceae	Mrakia	Duarte et al., 2016
Gigartina skottsbergii	Macroalgae	Cystofilobasidiales	Cystofilobasidiaceae	Mrakia	Duarte et al., 2016
Gigartina skottsbergii	Macroalgae	Cystofilobasidiales	Cystofilobasidiaceae	Mrakia	Duarte et al., 2016
Gigartina skottsbergii	Macroalgae	Cystofilobasidiales	Cystofilobasidiaceae	Mrakia	Duarte et al., 2016
Himantothallus grandifolius	Macroalgae	Cystofilobasidiales	Cystofilobasidiaceae	Mrakia	Duarte et al., 2016
Monostroma hariotii	Macroalgae	Cystofilobasidiales	Cystofilobasidiaceae	Mrakia	Duarte et al., 2016
Ulva	Macroalgae	Helotiales	Helotiales incertae sedis	Mycoarthris	Godinho et al., 2013
Ascoseira mirabilis	Macroalgae	Helotiales	Helotiales incertae sedis	Mycochaetophora	Martorell et al., 2020
Adenocystis utricularis	Macroalgae	Leotiomycetes incertae sedis	Myxotrichaceae	Oidiodendron	Loque et al., 2010
Pyropia endiviifolia	Macroalgae	Leotiomycetes incertae sedis	Myxotrichaceae	Oidiodendron	Furbino et al., 2014
Monostoma	Macroalgae	Eurotiales	Thermoascaceae	Paecilomyces	Godinho et al., 2013
Acrosiphonia	Macroalgae	Eurotiales	Aspergillaceae	Penicillium	Godinho et al., 2013
Adenocystis	Macroalgae	Eurotiales	Aspergillaceae	Penicillium	Godinho et al., 2013
Adenocystis urticularis	Macroalgae	Eurotiales	Aspergillaceae	Penicillium	Martorell et al., 2020
Adenocystis utricularis	Macroalgae	Eurotiales	Aspergillaceae	Penicillium	Loque et al., 2010
Ascoseira mirabilis	Macroalgae	Eurotiales	Aspergillaceae	Penicillium	Furbino et al., 2018
Desmarestia	Macroalgae	Eurotiales	Aspergillaceae	Penicillium	Godinho et al., 2013
Georgiella confluens	Macroalgae	Eurotiales	Aspergillaceae	Penicillium	Furbino et al., 2018
Gigartina skottsbergii	Macroalgae	Eurotiales	Aspergillaceae	Penicillium	Martorell et al., 2020
Iridaea cordata	Macroalgae	Eurotiales	Aspergillaceae	Penicillium	Furbino et al., 2018
Monostoma	Macroalgae	Eurotiales	Aspergillaceae	Penicillium	Godinho et al., 2013
Monostroma hariotii	Macroalgae	Eurotiales	Aspergillaceae	Penicillium	Furbino et al., 2014
Neuroglossum delesseriae	Macroalgae	Eurotiales	Aspergillaceae	Penicillium	Martorell et al., 2020
Palmaria decipiens	Macroalgae	Eurotiales	Aspergillaceae	Penicillium	Furbino et al., 2018
Palmaria decipiens	Macroalgae	Eurotiales	Aspergillaceae	Penicillium	Godinho et al., 2013
Palmaria decipiens	Macroalgae	Eurotiales	Aspergillaceae	Penicillium	Martorell et al., 2020
Phaeurus	Macroalgae	Eurotiales	Aspergillaceae	Penicillium	Godinho et al., 2013
Pyropia endiviifolia	Macroalgae	Eurotiales	Aspergillaceae	Penicillium	Furbino et al., 2014
Pyropia endiviifolia	Macroalgae	Eurotiales	Aspergillaceae	Penicillium	Furbino et al., 2014
Pyropia endiviifolia	Macroalgae	Eurotiales	Aspergillaceae	Penicillium	Furbino et al., 2014
Ulva	Macroalgae	Eurotiales	Aspergillaceae	Penicillium	Godinho et al., 2013
Adenocystis utricularis	Macroalgae	Pleosporales	Phaeosphaeriaceae	Phaeosphaeria	Loque et al., 2010
Acrosiphonia	Macroalgae	Pleosporales	Didymellaceae	Phoma	Godinho et al., 2013
Monostroma hariotii	Macroalgae	Pleosporales	Didymellaceae	Phoma	Furbino et al., 2014
Cystosphaera jacquinotii	Macroalgae	Ustilaginales	Ustilaginaceae	Pseudozyma	Duarte et al., 2016
Adenocystis utricularis	Macroalgae	Sporidiobolales	Sporidiobolaceae	Rhodotorula	Loque et al., 2010
Georgiella confluens	Macroalgae	Sporidiobolales	Sporidiobolaceae	Rhodotorula	Furbino et al., 2018
Gigartina skottsbergii	Macroalgae	Sporidiobolales	Sporidiobolaceae	Rhodotorula	Duarte et al., 2016
Himantothallus grandifolius	Macroalgae	Sporidiobolales	Sporidiobolaceae	Rhodotorula	Duarte et al., 2016
Monostoma	Macroalgae	Sporidiobolales	Sporidiobolaceae	Rhodotorula	Godinho et al., 2013
Monostroma hariotii	Macroalgae	Sporidiobolales	Sporidiobolaceae	Rhodotorula	Furbino et al., 2014
Palmaria decipiens	Macroalgae	Sporidiobolales	Sporidiobolaceae	Rhodotorula	Duarte et al., 2016
	Macroalgae	Sporidiobolales	Sporidiobolaceae	Rhodotorula	Duarte et al., 2013
Adenocystis utricularis	Macroalgae	Sporidiobolales	Sporidiobolaceae	Sporidiobolus	Duarte et al., 2016
Cystosphaera jacquinotii	Macroalgae	Sporidiobolales	Sporidiobolaceae	Sporidiobolus	Duarte et al., 2016
Desmarestia menziesii	Macroalgae	Ustilaginales	Ustilaginaceae	Sporisorium	Duarte et al., 2016
Acrosiphonia	Macroalgae	Thelebolales	Thelebolaceae	Thelebolus	Godinho et al., 2013
Pyropia endiviifolia	Macroalgae	Thelebolales	Thelebolaceae	Thelebolus	Furbino et al., 2014
Ulva	Macroalgae	Thelebolales	Thelebolaceae	Thelebolus	Godinho et al., 2013
Palmaria decipiens	Macroalgae	Entylomatales	Entylomatales incertae sedis	Tilletiopsis	Duarte et al., 2016
Desmarestia anceps	Macroalgae	Ustilaginales	Ustilaginaceae		Duarte et al., 2016
Palmaria decipiens	Macroalgae	Ustilaginales	Ustilaginaceae		Duarte et al., 2016
Pyropia endiviifolia	Macroalgae	Hypocreales	Hypocreales incertae sedis	Verticillium	Furbino et al., 2014
Palmaria decipiens	Macroalgae	Saccharomycetales	Debaryomycetaceae	Yamadazyma	Godinho et al., 2013
Monostroma hariotii	Macroalgae	Thelebolales	Pseudeurotiaceae	Pseudogymnoascus	Furbino et al., 2014
Monostroma hariotii	Macroalgae	Thelebolales	Pseudeurotiaceae	Pseudogymnoascus	Furbino et al., 2014
Pyropia endiviifolia	Macroalgae	Thelebolales	Pseudeurotiaceae	Pseudogymnoascus	Furbino et al., 2014
Pyropia endiviifolia	Macroalgae	Thelebolales	Pseudeurotiaceae	Pseudogymnoascus	Furbino et al., 2014
Pyropia endiviifolia	Macroalgae	Thelebolales	Pseudeurotiaceae	Pseudogymnoascus	Furbino et al., 2014
Acrosiphonia	Macroalgae	Thelebolales	Pseudeurotiaceae	Pseudogymnoascus	Godinho et al., 2013
Adenocystis	Macroalgae	Thelebolales	Pseudeurotiaceae	Pseudogymnoascus	Godinho et al., 2013
Monostroma	Macroalgae	Thelebolales	Pseudeurotiaceae	Pseudogymnoascus	Godinho et al., 2013
Palmaria decipiens	Macroalgae	Thelebolales	Pseudeurotiaceae	Pseudogymnoascus	Godinho et al., 2013
Phaeurus	Macroalgae	Thelebolales	Pseudeurotiaceae	Pseudogymnoascus	Godinho et al., 2013
Ulva	Macroalgae	Thelebolales	Pseudeurotiaceae	Geomyces	Godinho et al., 2013
Adenocystis utricularis	Macroalgae	Thelebolales	Pseudeurotiaceae	Pseudogymnoascus	Loque et al., 2010
Desmarestia anceps	Macroalgae	Thelebolales	Pseudeurotiaceae	Pseudogymnoascus	Loque et al., 2010
Gigartina skottsbergii	Macroalgae	Thelebolales	Pseudeurotiaceae	Pseudogymnoascus	Martorell et al., 2020
	Sediments	Hypocreales	Hypocreales incertae sedis	Acremonium	Ogaki et al., 2020
	Sediments	Eurotiales	Aspergillaceae	Aspergillus	Wen-ting Li et al., 2018
	Sediments	Helotiales	Ploettnerulaceae	Cadophora	Puric et al., 2018
	Sediments	Helotiales	Ploettnerulaceae	Cadophora	Veira et al., 2018
	Sediments	Helotiales	Ploettnerulaceae	Cadophora	Wentzel et al., 2019| Viera et al., 2018
	Sediments	Helotiales	Ploettnerulaceae	Cadophora	Duarte et al., 2018
	Sediments	Cladosporiales	Cladosporiaceae	Cladosporium	Puric et al., 2018
	Sediments	Cladosporiales	Cladosporiaceae	Cladosporium	Wentzel et al., 2019| Viera et al., 2018
	Sediments	Tremellales	Cryptococcaceae	Cryptococcus	Duarte et al., 2013
	Sediments	Tremellales	Cryptococcaceae	Cryptococcus	Vaz et al., 2011
	Sediments	Tremellales	Cryptococcaceae	Cryptococcus	Wentzel et al., 2019| Viera et al., 2018
	Sediments	Cystobasidiales	Cystobasidiaceae	Cystobasidium	Wentzel et al., 2019| Viera et al., 2018
	Sediments	Saccharomycetales	Debaryomycetaceae	Debaryomyces	Duarte et al., 2013
	Sediments	Kriegeriales	Camptobasidiaceae	Glaciozyma	Wentzel et al., 2019| Viera et al., 2018
	Sediments	Tremellomycetes		Holtermanniella	Wentzel et al., 2019| Viera et al., 2018
	Sediments	Sordariales	Chaetomiaceae	Humicola	Weinstein et al., 2000
	Sediments	Leucosporidiales	Leucosporidiaceae	Leucosporidiella	Vaz et al., 2011
	Sediments	Leucosporidiales	Leucosporidiaceae	Leucosporidium	Duarte et al., 2013
	Sediments	Saccharomycetales	Metschnikowiaceae	Metschnikowia	Duarte et al., 2013
	Sediments	Saccharomycetales	Metschnikowiaceae	Metschnikowia	Vaz et al., 2011
	Sediments	Saccharomycetales	Metschnikowiaceae	Metschnikowia	Wentzel et al., 2019| Viera et al., 2018
	Sediments	Saccharomycetales	Debaryomycetaceae	Meyerozyma	Duarte et al., 2013
	Sediments	Saccharomycetales	Debaryomycetaceae	Meyerozyma	Wentzel et al., 2019| Viera et al., 2018
	Sediments	Mortierellales	Mortierellaceae	Mortierella	Weinstein et al., 2000
	Sediments	Cystofilobasidiales	Cystofilobasidiaceae	Mrakia	Wentzel et al., 2019| Viera et al., 2018
	Sediments	Pleosporales	Didymosphaeriaceae	Paraconiothyrium	Puric et al., 2018
	Sediments	Pleosporales	Didymosphaeriaceae	Paraconiothyrium	Veira et al., 2018
	Sediments	Pleosporales	Didymosphaeriaceae	Paraconiothyrium	Wentzel et al., 2019| Viera et al., 2018
	Sediments	Eurotiales	Aspergillaceae	Penicillium	Goncalves et al., 2013
	Sediments	Eurotiales	Aspergillaceae	Penicillium	Liu et al., 2019
	Sediments	Eurotiales	Aspergillaceae	Penicillium	Minh Ha et al., 2020
	Sediments	Eurotiales	Aspergillaceae	Penicillium	Niu et al., 2017
	Sediments	Eurotiales	Aspergillaceae	Penicillium	Ogaki et al., 2020
	Sediments	Eurotiales	Aspergillaceae	Penicillium	Puric et al., 2018
	Sediments	Eurotiales	Aspergillaceae	Penicillium	Veira et al., 2018
	Sediments	Eurotiales	Aspergillaceae	Penicillium	Wentzel et al., 2019| Viera et al., 2018
	Sediments	Eurotiales	Aspergillaceae	Penicillium	Wu et al., 2012
	Sediments	Eurotiales	Aspergillaceae	Penicillium	Wu et al., 2013| Lin et al., 2014
	Sediments	Eurotiales	Aspergillaceae	Penicillium	Zhou et al., 2018
	Sediments	Xylariales	Sporocadaceae	Pestalotiopsis	Puric et al., 2018
	Sediments	Xylariales	Sporocadaceae	Pestalotiopsis	Wentzel et al., 2019| Viera et al., 2018
	Sediments	Togniniales	Togniniaceae	Phaeoacremonium	Puric et al., 2018
	Sediments	Kriegeriales	Kriegeriaceae	Phenoliferia	Wentzel et al., 2019| Viera et al., 2018
	Sediments	Leotiomycetes incertae sedis	Pseudeurotiaceae	Pseudeurotium	Duarte et al., 2018
	Sediments	Mycosphaerellales	Mycosphaerellaceae	Pseudocercosporella	Puric et al., 2018
	Sediments	Mycosphaerellales	Mycosphaerellaceae	Pseudocercosporella	Wentzel et al., 2019| Viera et al., 2018
	Sediments	Sporidiobolales	Sporidiobolaceae	Rhodotorula	Vaz et al., 2011
	Sediments	Sporidiobolales	Sporidiobolaceae	Rhodotorula	Wentzel et al., 2019| Viera et al., 2018
	Sediments	Cladosporiales	Cladosporiaceae	Toxicocladosporium	Puric et al., 2018
	Sediments	Cladosporiales	Cladosporiaceae	Toxicocladosporium	Veira et al., 2018
	Sediments	Cladosporiales	Cladosporiaceae	Toxicocladosporium	Wentzel et al., 2019| Viera et al., 2018
	Sediments	Hypocreales	Hypocreaceae	Trichoderma	Ren et al., 2013
	Sediments	Thelebolales	Pseudeurotiaceae	Geomyces	Duarte et al., 2018
	Sediments	Thelebolales	Pseudeurotiaceae	Pseudogymnoascus	Ogaki et al., 2020
	Sediments	Thelebolales	Pseudeurotiaceae	Pseudogymnoascus	Puric et al., 2018
	Sediments	Thelebolales	Pseudeurotiaceae	Pseudogymnoascus	Veira et al., 2018
	Sediments	Thelebolales	Pseudeurotiaceae	Pseudogymnoascus	Weinstein et al., 2000
	Sediments	Thelebolales	Pseudeurotiaceae	Pseudogymnoascus	Wentzel et al., 2019| Viera et al., 2018
	Sediments (M)	Cladosporiales	Cladosporiaceae	Cladosporium	Ogaki et al., 2021
	Sediments (M)	Mortierellales	Mortierellaceae	Mortierella	Ogaki et al., 2021
	Sediments (M)	Eurotiales	Aspergillaceae	Penicillium	Ogaki et al., 2021
	Sediments (M)	Pleosporales	Phaeosphaeriaceae	Phaeosphaeria	Ogaki et al., 2021
	Sediments (M)	Thelebolales	Pseudeurotiaceae	Pseudogymnoascus	Ogaki et al., 2021
	Unknown	Tremellales	Cryptococcaceae	Cryptococcus	Petrescu et al., 2000
	Water	Hypocreales	Hypocreales incertae sedis	Acremonium	Goncalves et al., 2017
	Water	Hypocreales	Hypocreales incertae sedis	Acremonium	Goncalves et al., 2017
	Water	Hypocreales	Hypocreales incertae sedis	Acremonium	Goncalves et al., 2017
	Water	Hypocreales	Cordycipitaceae	Akanthomyces	Goncalves et al., 2017
	Water	Eurotiales	Aspergillaceae	Aspergillus	Goncalves et al., 2017
	Water	Saccharomycetales	Saccharomycetaceae	Candida	Vaz et al., 2011
	Water	Cladosporiales	Cladosporiaceae	Cladosporium	Goncalves et al., 2017
	Water	Cladosporiales	Cladosporiaceae	Cladosporium	Goncalves et al., 2017
	Water	Tremellales	Cryptococcaceae	Cryptococcus	Vaz et al., 2011
	Water	Cystobasidiales	Cystobasidiaceae	Cystobasidium	Goncalves et al., 2017
	Water	Chaetothyriales	Herpotrichiellaceae	Exophiala	Goncalves et al., 2017
	Water	Chaetothyriales	Herpotrichiellaceae	Exophiala	Goncalves et al., 2017
	Water	Chaetothyriales	Herpotrichiellaceae	Exophiala	Goncalves et al., 2017
	Water	Chaetothyriales	Herpotrichiellaceae	Exophiala	Goncalves et al., 2017
	Water	Chaetothyriales	Herpotrichiellaceae	Exophiala	Goncalves et al., 2017
	Water	Kriegeriales	Camptobasidiaceae	Glaciozyma	Goncalves et al., 2017
	Water	Kriegeriales	Camptobasidiaceae	Glaciozyma	Goncalves et al., 2017
	Water	Kriegeriales	Camptobasidiaceae	Glaciozyma	Goncalves et al., 2017
	Water	Kriegeriales	Camptobasidiaceae	Glaciozyma	Goncalves et al., 2017
	Water	Microascales	Microascaceae	Graphium	Goncalves et al., 2017
	Water	Microascales	Microascaceae	Graphium	Goncalves et al., 2017
	Water	Microascales	Microascaceae	Graphium	Goncalves et al., 2017
	Water	Leucosporidiales	Leucosporidiaceae	Leucosporidiella	Vaz et al., 2011
	Water	Leucosporidiales	Leucosporidiaceae	Leucosporidium	Turkiewicz et al., 2005
	Water	Leucosporidiales	Leucosporidiaceae	Leucosporidium	Vaz et al., 2011
	Water	Saccharomycetales	Metschnikowiaceae	Metschnikowia	Goncalves et al., 2017
	Water	Saccharomycetales	Metschnikowiaceae	Metschnikowia	Goncalves et al., 2017
	Water	Saccharomycetales	Metschnikowiaceae	Metschnikowia	Vaz et al., 2011
	Water	Eurotiales	Aspergillaceae	Penicillium	Goncalves et al., 2017
	Water	Eurotiales	Aspergillaceae	Penicillium	Goncalves et al., 2017
	Water	Eurotiales	Aspergillaceae	Penicillium	Goncalves et al., 2017
	Water	Eurotiales	Aspergillaceae	Penicillium	Goncalves et al., 2017
	Water	Eurotiales	Aspergillaceae	Penicillium	Goncalves et al., 2017
	Water	Eurotiales	Aspergillaceae	Penicillium	Goncalves et al., 2017
	Water	Eurotiales	Aspergillaceae	Penicillium	Goncalves et al., 2017
	Water	Hypocreales	Ophiocordycipitaceae	Purpureocillium	Goncalves et al., 2017
	Water	Sporidiobolales	Sporidiobolaceae	Rhodotorula	Vaz et al., 2011
	Water	Hypocreales	Cordycipitaceae	Simplicillium	Goncalves et al., 2017
	Water	Hypocreales	Cordycipitaceae	Simplicillium	Goncalves et al., 2017
