# Supplementary figures and images for: Diversity, Ecological Role and Biotechnological Potential of Antarctic Marine Fungi
Source: MDPI journal article supplement (doi:10.3390/jof7050391), 2021-05-17

Figure S3

Aspereline C

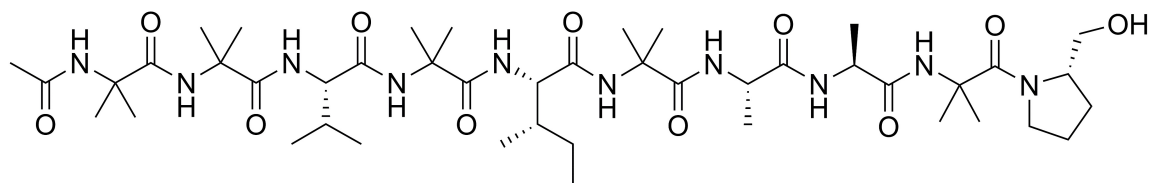

Aspereline D

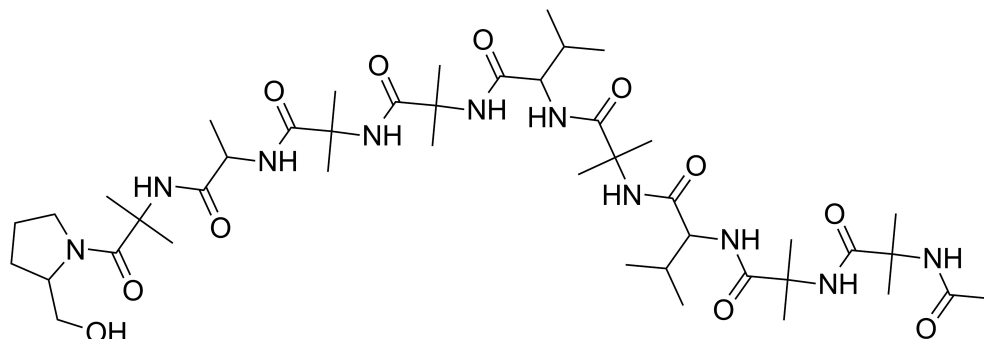

Aspereline E

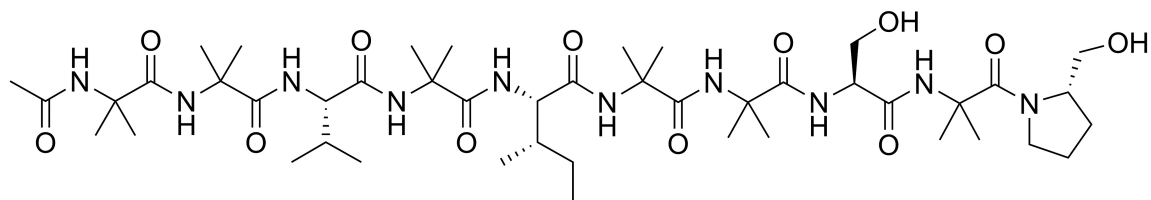

Aspereline F

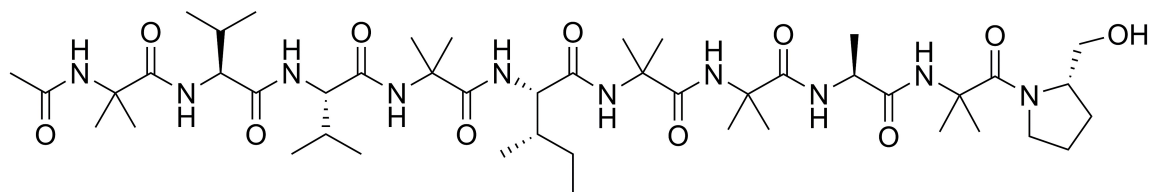

Supplement: s1 [file s1]
